# Supplementary material
Source: PubMed Central journal article supplement (PMC5794518)
Supplement: NIHMS937160-supplement-ESI.pdf [file NIHMS937160-supplement-ESI.pdf]

# Electronic Supplementary Information

## pH-Dependent Cooperativity and Existence of a Dry Molten Globule in the Folding of a Miniprotein BBL

Zhi Yue, and Jana Shen\*

Department of Pharmaceutical Sciences, University of Maryland School of Pharmacy, Baltimore, MD 21201-1075, USA

Corresponding author: jana.shen@rx.umaryland.edu

### Data analysis

All analyses were conducted by CHARMM<sup>1</sup> (version c37b1) or GROMACS<sup>2</sup> (version 4.5.5). The trajectory snapshots were aligned to the backbone atoms of the NMR model (first entry in the PDB 1W4H<sup>3</sup>).

RMSD of the backbone atoms (N, C<sub>α</sub>, C), excluding the unstructured tails (residues 126–132, 170) were calculated following least-square fitting to the corresponding backbone of the NMR model<sup>3</sup>. RMSD was calculated using the CHARMM command COOR rms or the GROMACS tool g\_rms.

The hydrophobic core used to calculate  $R_g$  is comprised of Ile135, Leu138, Leu139, Leu144, Ala146, Ala148, Ile149, Leu158, Val163, His166, and Leu167<sup>4–6</sup>. Calculation used the CHARMM command CORREL or the GROMACS tool g\_gyrate.

$\alpha$ -helices span residues 133-141 (NT-helix) and 160-168 (CT-helix), respectively. The interhelical angle was calculated using the CHARMM command COOR helix.

Secondary structure was identified using the GROMACS tool do\_dssp based on the DSSP algorithm<sup>7</sup>. The helicity of a residue is defined as the frequency of occurrence of the  $\alpha$ -helical conformation.

Clustering was performed using the GROMACS tool g\_cluster based on the GROMOS algorithm<sup>8</sup>. Backbone atoms (N, C<sub>α</sub>, C) excluding the unstructured tails (residues 126–132, 170) were used for the least-squares fit and RMSD calculation in cluster analysis. Large cutoff such as 3.5 or 5 Å was used to split wide-separated states. To reveal finer differences, cutoff of 1.5 or 1 Å was used.

Two non-neighboring residues  $i$  and  $j$  ( $j > i+1$ ) are defined as in contact if the center-of-geometry (COG) distance between side-chain heavy atoms (C<sub>α</sub> for Gly residues) is closer than 6.5 Å<sup>9</sup>. A contact was considered native if it occurred with at least 50% probability in the control simulation. With native contacts defined,  $q$  can be calculated using the CHARMM command COOR dmat for CHARMM trajectories and an in-house Tcl script for VMD<sup>10</sup> for GROMACS trajectories.

## Supplementary Tables and Figures

Table S1: Comparison of published NMR models of BBL<sup>a</sup>

| PDB  | Sequence | Mutation | NMR conditions |     |           | RMSD (Å) | $R_g$ (Å) | Reference               |
|------|----------|----------|----------------|-----|-----------|----------|-----------|-------------------------|
|      |          |          | T (K)          | pH  | Salt (mM) |          |           |                         |
| 1W4H | 126–170  | WT       | 298            | 7.0 | 200       | 0.0      | 6.0       | Fersht <sup>3</sup>     |
| 2CYU | 131–169  | WT       | 278            | 5.3 | 0         | 1.8      | 7.0       | Munõz <sup>11</sup>     |
| 1BBL | 131–167  | WT       | 298            | 5.3 | -         | 1.6      | 6.8       | Gronenborn <sup>4</sup> |
| 1BAL | 121–170  | WT       | 298            | 5.3 | -         | 1.7      | 6.8       | Gronenborn <sup>4</sup> |
| 2BTH | 126–170  | H166W    | 298            | 6.5 | 200       | 0.9      | 6.2       | Fersht <sup>3</sup>     |
| 2BTG | 126–170  | H166W    | 298            | 6.5 | 200       | 0.8      | 6.3       | Fersht <sup>3</sup>     |
| 2WAV | 126–170  | H142W    | 298            | 7.0 | 200       | 0.9      | 6.2       | Fersht <sup>12</sup>    |
| 2WXC | 126–170  | H142W    | 298            | 7.0 | 200       | 1.1      | 6.1       | Fersht <sup>12</sup>    |

<sup>a</sup>RMSD refers to the root-mean-squared deviation of backbone atoms of residues 133–167 with respect to the NMR model (first entry in PDB 1W4H).

Table S2: Summary of calculated  $pK_a$  values for BBL<sup>a</sup>

| Residue | Experiment <sup>b</sup> | $pK_a^N$ | $pK_a^{DMG}$ | $pK_a^D$ |
|---------|-------------------------|----------|--------------|----------|
| D129    | 3.88±0.02               | 3.2      | 3.4          | 3.4      |
| E141    | 4.46±0.04               | 3.5      | 3.5          | 3.5      |
| H142    | 6.47±0.04               | 6.8      | 7.3          | 6.9      |
| D145    | 3.65±0.04               | 3.2      | 3.5          | 3.3      |
| E161    | 3.72±0.05               | 3.4      | 3.1          | 3.5      |
| D162    | 3.18±0.04               | 1.0      | 2.8          | 3.4      |
| E164    | 4.50±0.03               | 3.4      | 3.7          | 3.2      |
| H166    | 5.39±0.02               | 6.0      | 6.4          | 6.7      |

<sup>a</sup>N, DMG, and D denote native, dry molten globule, and denatured state, respectively. Titration was also performed for all Lys and Arg residues: Lys150, Lys160, Lys165, Lys169, Arg136, Arg137, Arg157, Arg160. Their  $pK_a$ 's are not listed here as they were protonated at all pH conditions in the duration of simulation. <sup>b</sup>Experimental  $pK_a$ 's were determined by Fersht and coworkers using NMR titration<sup>13,14</sup>.

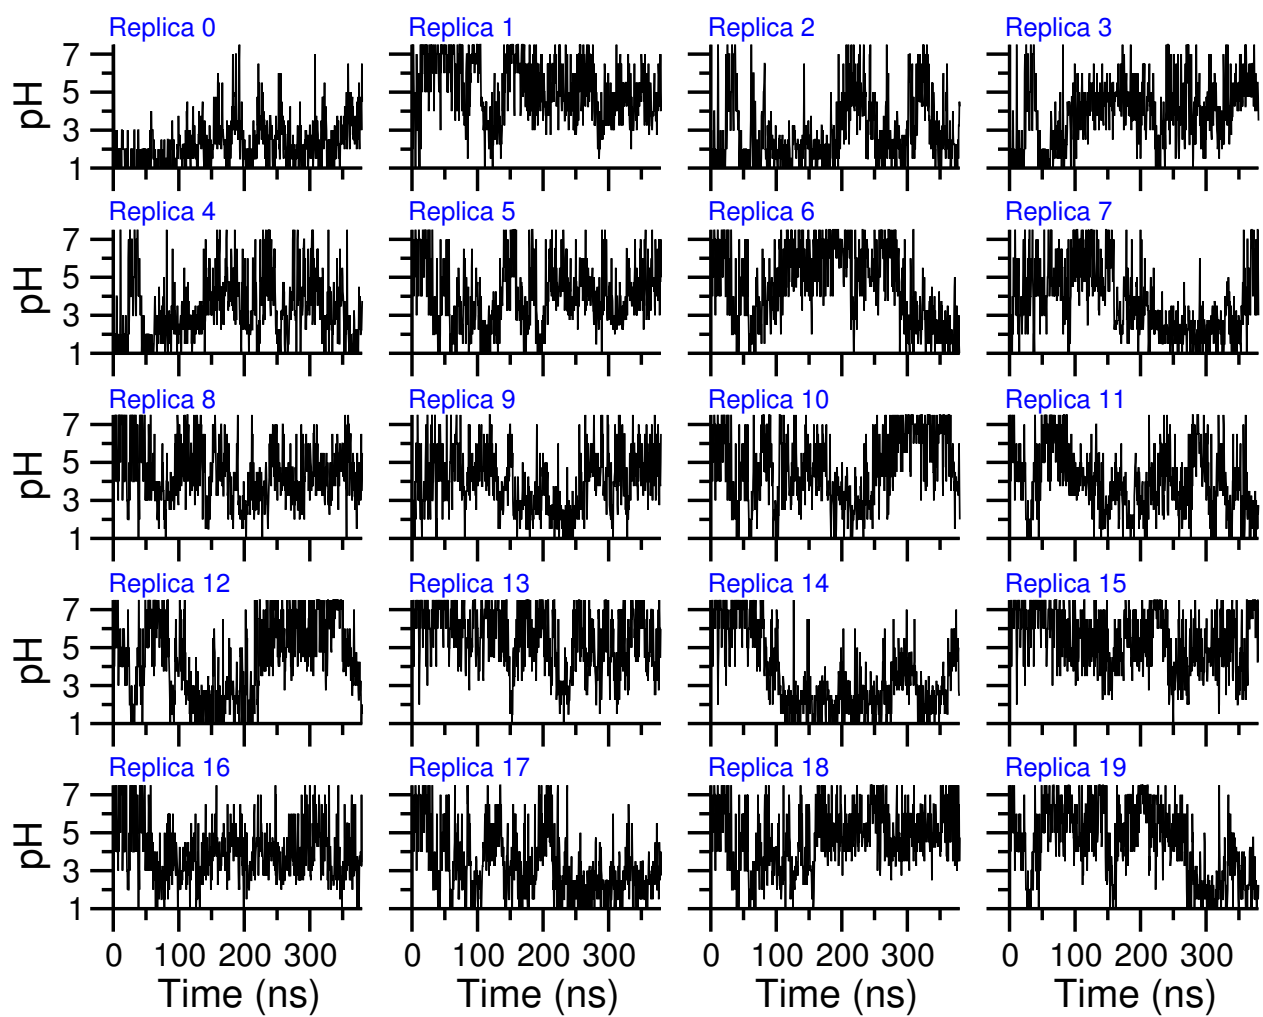

Figure S1: **Multiple replicas walked through the entire pH ladder.** pH condition for each replica as a function of simulation time. Sampled every 500 ps.

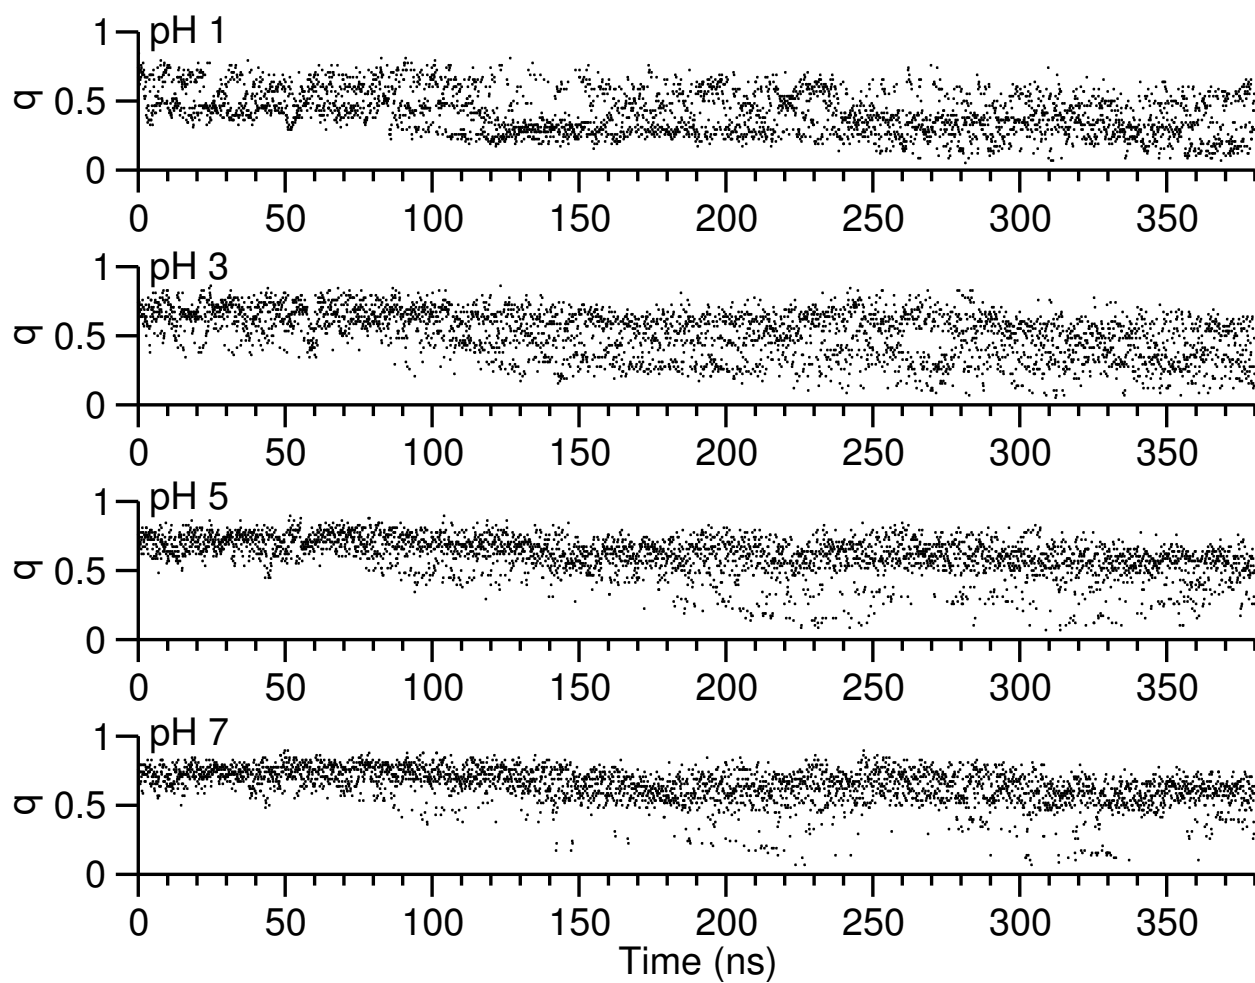

Figure S2: **Fraction of native contacts is converged.** The fraction of native contacts at different pH conditions as a function of simulation time. Definition is given in the main text.

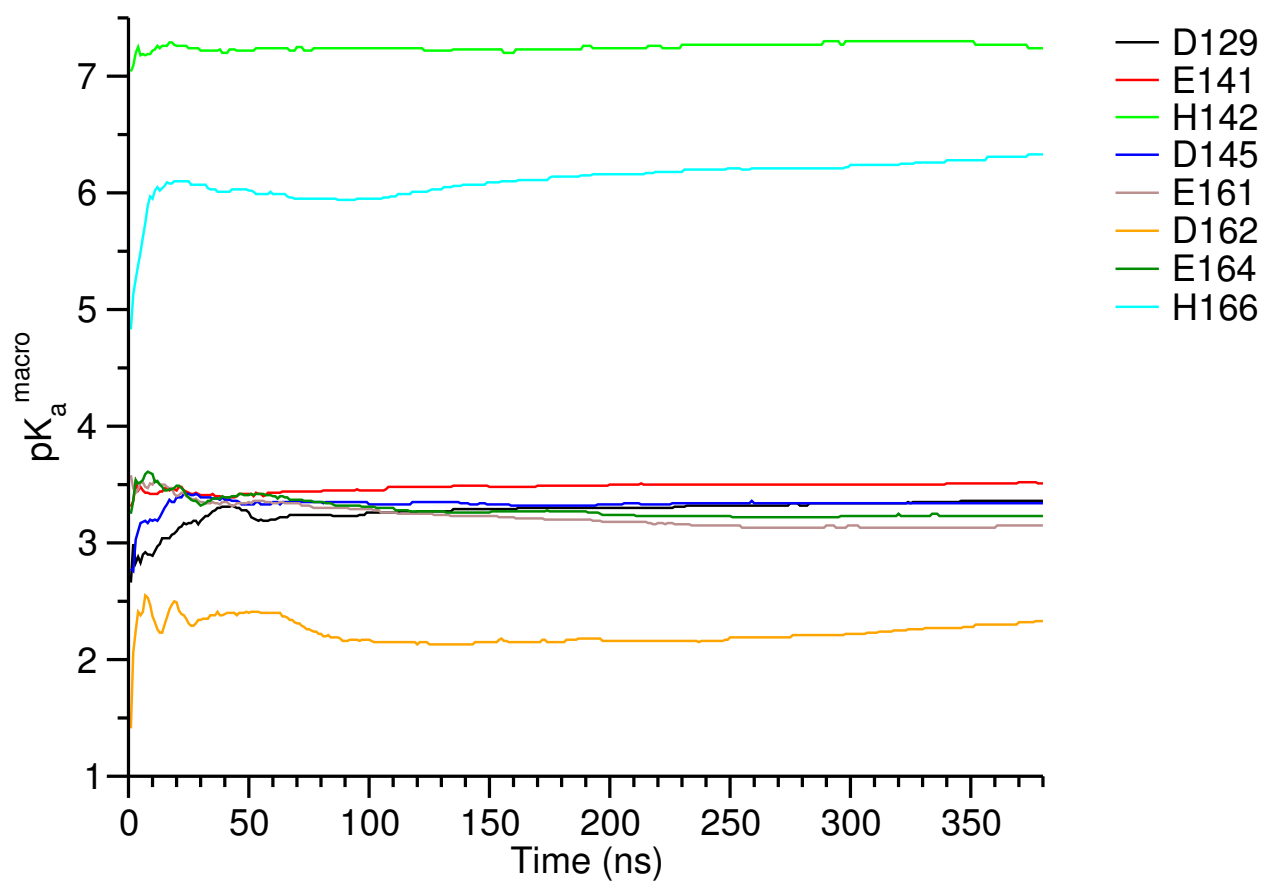

Figure S3: **Macroscopic pK<sub>a</sub>'s are converged.** Cumulatively calculated pK<sub>a</sub>'s for all Asp/Glu/His residues as a function of simulation time. Lys and Arg sidechains were always protonated at all pH conditions and are thus not shown in the figure.

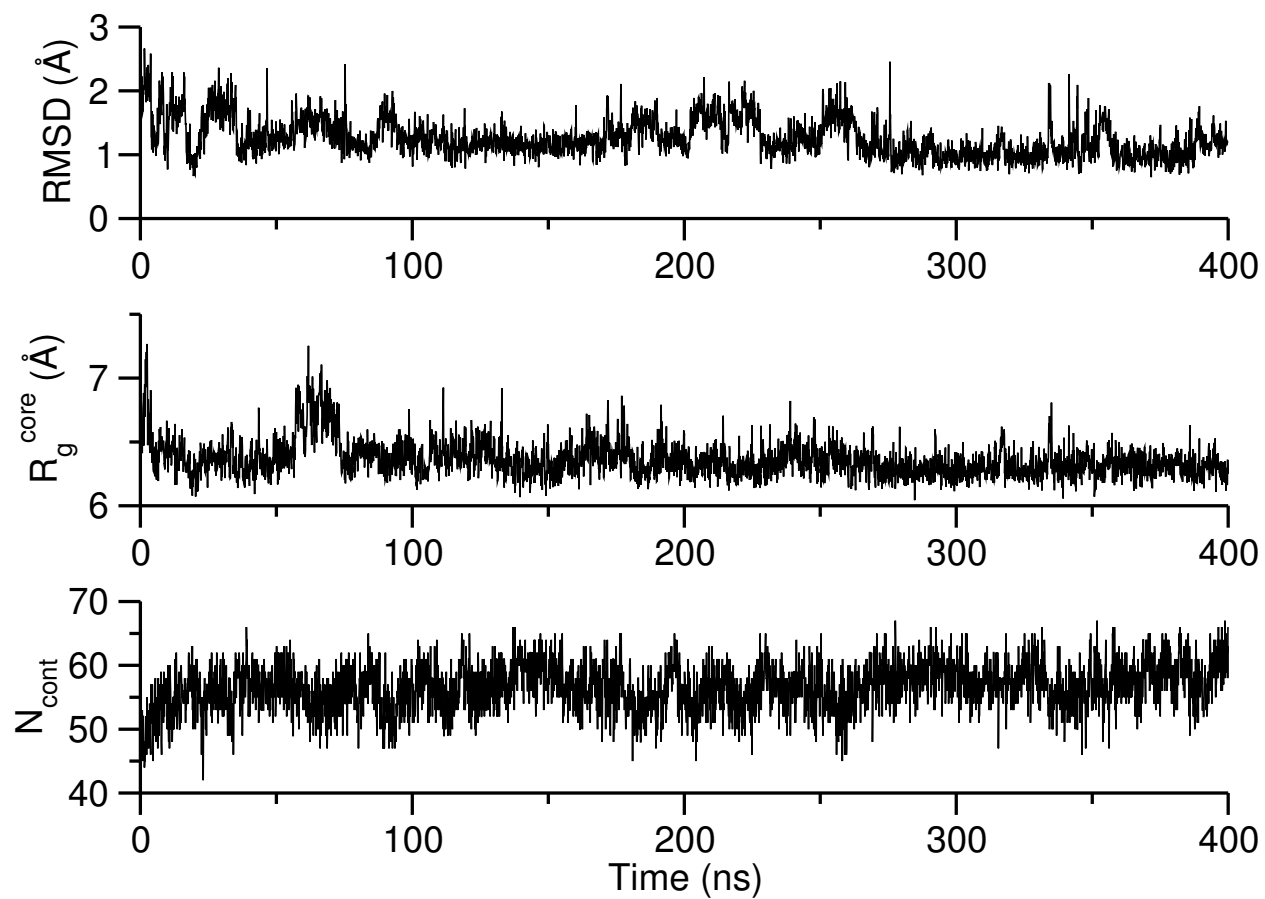

Figure S4: **Stability and convergence of the control simulation.** Time series of the backbone RMSD (top), radius of gyration of the hydrophobic core, and the total number of side-chain contacts (bottom). Sampled every 100 ps.

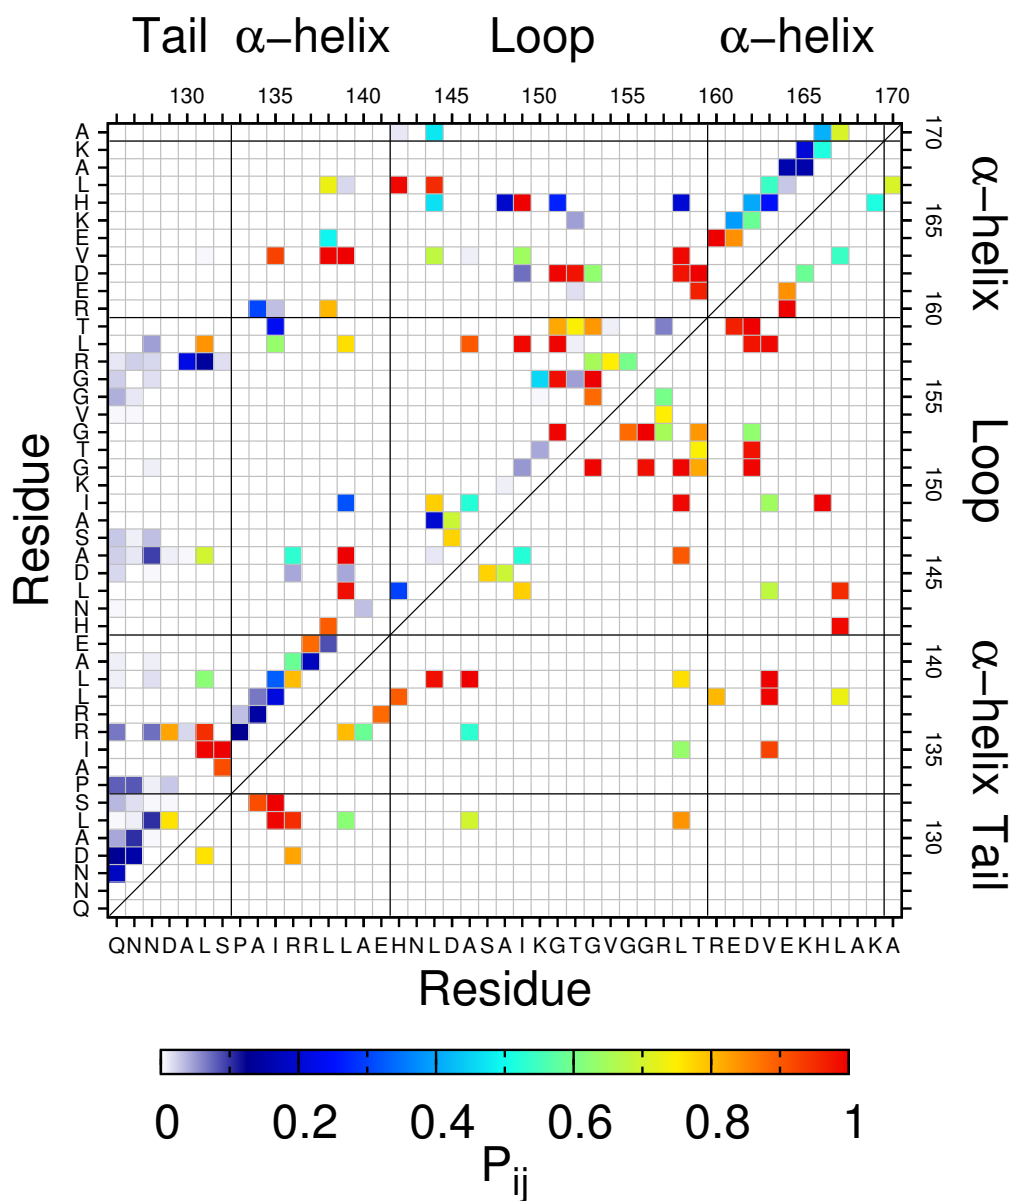

Figure S5: **Native contacts in BBL**. Upper triangle: Map of contacts. The contact occupancy is color coded from blue to red. Two residues are considered in contact if the center of geometry distance between the side chain heavy atoms is within 6.5 Å. Lower triangle: Map of native contacts. A contact is considered native if the occupancy is above 0.5.

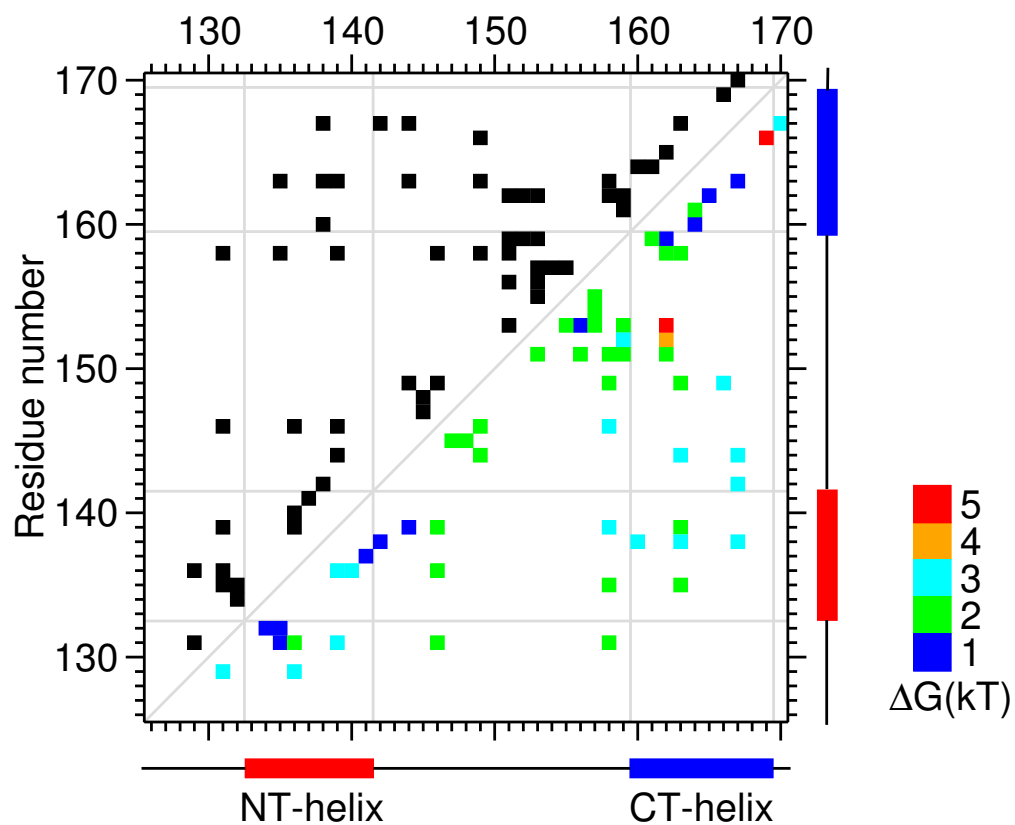

Figure S6: **Native contacts in the denatured state of BBL.** Upper triangle: Map of native contacts. Lower triangle: Destabilization of native contacts in the denatured state. A destabilization free energy, defined as the contact occupancy relative to that in the native state, is calculated for each contact.



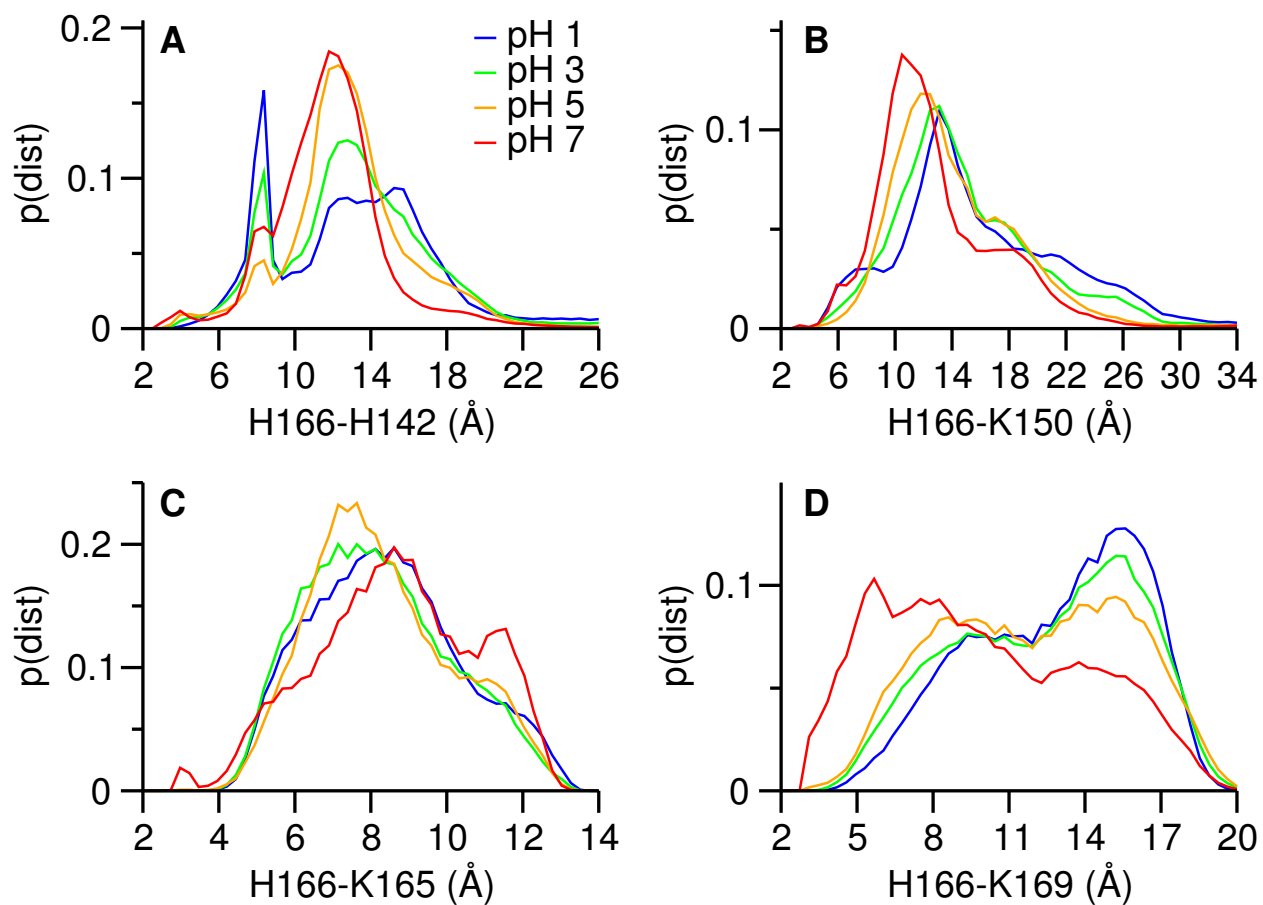

Figure S7: **His166 experiences repulsion from Lys169 once it becomes protonated.** Minimum distance between the sidechain nitrogen atoms of His166 and Lys169.

## References

- [1] B. R. Brooks, C. L. Brooks, III, A. D. Mackerell, Jr., L. Nilsson, R. J. Petrella, B. Roux, Y. Won, G. Archontis, C. Bartles, S. Boresch, A. Caflisch, L. Caves, Q. Cui, A. R. Dinner, M. Feig, S. Fischer, J. Gao, M. Hodoscek, W. Im, K. K. T. Lazaridis, J. Ma, V. Ovchinnikov, E. Paci, R. W. Pastor, C. B. Post, J. Z. Pu, M. Schaefer, B. Tidor, R. M. Venable, H. L. Woodcock, X. Wu, W. Yang, D. M. York and M. Karplus, *J. Comput. Chem.*, 2009, **30**, 1545–1614.
- [2] S. Pronk, S. Páll, R. Schulz, P. Larsson, P. Bjelkmar, R. Apostolov, M. R. Shirts, J. C. Smith, P. M. Kasson, D. van der Spoel, B. Hess and E. Lindahl, *Bioinformatics*, 2013, **29**, 845–854.
- [3] N. Ferguson, T. D. Sharpe, P. J. Schartau, S. Sato, M. D. Allen, C. M. Johnson, T. J. Rutherford and A. R. Fersht, *J. Mol. Biol.*, 2005, **353**, 427–446.
- [4] M. A. Robien, G. M. Clore, J. G. Omichinski, R. N. Perham, E. Appella, K. Sakaguchi and A. M. Gronenborn, *Biochemistry*, 1992, **31**, 3463–3471.
- [5] G. Zuo, J. Wang and W. Wang, *Proteins*, 2006, **63**, 165–173.
- [6] H. Liu and S. Huo, *J. Phys. Chem. B*, 2012, **116**, 646–652.
- [7] W. Kabsch and C. Sander, *Biopolymers*, 1983, **22**, 2577–2637.
- [8] X. Daura, K. Gademann, B. Jaun, D. Seebach, W. F. van Gunsteren and A. E. Mark, *Angew. Chem. Int. Ed.*, 1999, **38**, 236–240.
- [9] J.-E. Shea and C. L. Brooks, III, *Annu. Rev. Phys. Chem.*, 2001, **52**, 499–535.
- [10] W. Humphrey, A. Dalke and K. Schulten, *J. Mol. Graphics*, 1996, **14**, 33–38.
- [11] M. Sadqi, D. Fushman and V. Muñoz, *Nature*, 2006, **442**, 317–321.
- [12] H. Neuweiler, T. D. Sharpe, T. J. Rutherford, C. M. Johnson, M. D. Allen, N. Ferguson and A. R. Fersht, *J. Mol. Biol.*, 2009, **390**, 1060–1073.
- [13] E. Arbely, T. J. Rutherford, T. D. Sharpe, N. Ferguson and A. R. Fersht, *J. Mol. Biol.*, 2009, **387**, 986–992.
- [14] E. Arbely, T. J. Rutherford, H. Neuweiler, T. D. Sharpe, N. Ferguson and A. R. Fersht, *J. Mol. Biol.*, 2010, **403**, 313–327.
